# Supplementary material for: Loss of immune homeostasis in patients with idiopathic pulmonary arterial hypertension
Source: PubMed Central journal article supplement (PMC8606455; doi:10.1136/thoraxjnl-2020-215460), 2021-05-07
Supplement: thoraxjnl-2020-215460supp001.pdf [file thoraxjnl-2020-215460supp001.pdf]

1 **Online Supplementary data to:**

2

3 **Loss of Immune Homeostasis in Patients with Idiopathic Pulmonary Arterial**  
4 **Hypertension**

5

6 Peter Heukels et al

7

8

9

10

11

12

13

14

15

16

17

18

19

20

21

22

23

24

25

26

27

28

29

30

31

## 32 **online supplementary methods**

33

### 34 **Human flow cytometry procedures**

35 Blood samples were collected in ethylenediaminetetraacetic acid (EDTA) tubes (BD Vacutainer K2E).  
36 Peripheral blood mononuclear cells (PBMCs) and plasma were obtained, processed and stored  
37 according to standard protocols.<sup>1</sup>

38 PBMCs were stained for extra- and intracellular markers (**online supplementary table 1**). To  
39 prevent non-specific labeling Fc-block (Anti-Mouse CD16/CD32 Fc-Block) was used. Fixable Viability  
40 Dye eFluor 506 (eBiosciences) was applied as a live-dead marker. Flow cytometry procedures for B-cell  
41 staining have been described previously<sup>2</sup>. Cells for the T-cell staining were first incubated in MACS  
42 buffer (0.5% BSA + 2mM EDTA in PBS) with fluorescent antibodies against chemokine receptors for 60  
43 minutes at 4°C. A second extracellular incubation step was performed for antibodies with Brilliant  
44 Violet (BV) conjugates in Brilliant Stain-buffer (BD Biosciences, cat#563794). After fixation and  
45 permeabilization, cells were incubated with a forkhead box P3 (FOXP3)-specific antibody in  
46 permeabilization buffer for 60 minutes at 4°C. Live cells (>200,000) were acquired and data were  
47 analyzed by FACS Flow-Jo software.

48

### 49 **mouse experiments and procedures**

50

#### 51 **Genotyping and inducing pulmonary injury**

52 CD19-hBtk<sup>3</sup> on a mixed background (Fvb × 129/Sv × C57BL/6J) were backcrossed on C57BL/6J for > 10  
53 generations. Genotyping was performed by polymerase chain reaction (PCR), as previously described.<sup>4</sup>  
54 Wild-type mice used for the experiments are non-transgenic littermates. Mice were bred and kept at  
55 specified pathogen-free conditions in the Erasmus MC experimental animal facility. All experimental  
56 protocols have been reviewed and approved by the Erasmus MC Committee of animal experiments.  
57 To induce pulmonary injury, bleomycin-hydrochloride was administered intra tracheally in 8-10 week  
58 old mice (0,04U/80 µl saline) or saline as a control as previously described.<sup>5</sup> Mice were sacrificed 21  
59 days and 70 days after bleomycin exposure.

60

#### 61 **Right ventricular systolic pressure (RVSP) and lung tissue elastance**

62 Mice were anaesthetized with isoflurane and right ventricular pressures were recorded using right  
63 heart catheterizations (mikro-tip catheter 1,4F, Millar instruments, model SPR-671) and analyzed with  
64 WinDaq Data acquisition software. Lung tissue elastance was measured with a flexiVent FX system as  
65 previously described.<sup>6</sup> Data was analyzed with flexiWare 7 software.

66

**67 Flow cytometric procedures**

68 Preparations of single-cell suspensions of MLN using standard procedures. Monoclonal antibodies are  
69 listed in **online supplementary table 1**. For intracellular staining, cells were fixed in Cytofix/Cytoperm  
70 and permeabilized, and then stained in Perm/Wash buffer (BD Bioscience). All measurements were  
71 performed on a LSRII flow cytometer (BD Bioscience), and results were analyzed using FlowJo software.  
72

**73 Immunohistochemistry**

74 Immunohistochemical analyses and staining were performed according to standard procedures.<sup>7</sup> Used  
75 antibodies are listed in **online supplementary table 1**. After staining, tissue sections were embedded  
76 in Kaiser glycerol gelatin (Merck). Pulmonary vascular remodeling was studied by quantification of  
77 intraacinar pulmonary vessels containing  $\alpha$ -smooth muscle actin ( $\alpha$ -SMA)-positive cells in their walls.  
78 Vessels between and 15 and 50 $\mu$ m external diameter and located in normal lung tissue were assessed.  
79 To assess the presence of self-reactive antigens in serum of CD19-hBTK and control mice, serum was  
80 stored and frozen until further use. Serum was subjected to cryo-sections of lungs of RAG<sup>-/-</sup> mice  
81 (lacking mature B and T lymphocytes). Detection Antibodies against IgG and IgM are listed in **online**  
82 **supplementary table 1**. Micrographs were made using a DM LB light microscope (Leica), a DFC500  
83 camera (Leica), and Imaging for Windows Version 1.0 software (Kodak).

84

**85 The Fulton index**

86 Hearts were excised and dissected to determine the ratio of right ventricular to left ventricular and  
87 septal weight [RV/(LV + S)].

88

**89 Hydroxy proline assay**

90 Whole left lung homogenates were analyzed by quantitative hydroxyproline assay. The left lung  
91 homogenate was hydrolyzed in 6M HCl at 95°C for 20 hours. Hydroxyproline was oxidized with  
92 chloramine t, and visualized with Erlich's reagent (4-DMAB, isopropanol and perchloric acid)  
93 measured at a microplate reader at 560nm.

94

**95 HEp-2**

96 To assess the presence of self-reactive antigens in serum of CD19-hBTK and control mice, serum was  
97 stored and frozen until further use. Serum samples (1/50 diluted) were incubated for 1 hour on  
98 Kallestad human epithelial cell (HEp-2) slides (Bio-Rad Laboratories). As detection antibodies Ig  
99 F(ab')<sub>2</sub> fragments were applied to the HEp2 slides (**online supplementary table 1**). The fluorescence

100 intensity of HEp2 slides was evaluated using a LSM 311 META confocal fluorescence microscope  
101 (Zeiss) and LSM Image Browser Version 4.2.0.12 software (Zeiss)

102

### 103 **$\alpha$ -SMA area to total artery area**

104 Percentage  $\alpha$ -SMA area to total artery area was evaluated using NanoZoomer 2.0-HT slide scanner  
105 (Hamamatsu) and NDP.view 2.7.25 (Hamamatsu). Photos were analysed using Adobe Photoshop  
106 2021 in an automated and thus independent manner.

107

### 108 **Total fibrosis score**

109 A pathologist (blinded for treatment) scored the Ashcroft scale (grade 1-8)<sup>8</sup> and the percentage of  
110 lung involvement (grade 1-5; 1 =0-10% to 6 = 75-100% of total lung involvement). The Total Fibrosis  
111 score (TFS) is the product of Ashcroft scale and lung involvement and was previously described.<sup>9</sup>

112

113 1. Heukels P, van Hulst JAC, van Nimwegen M, Boorsma CE, Melgert BN, van den Toorn LM, *et al.* Fibrocytes are increased in lung and peripheral blood of patients with idiopathic  
114 pulmonary fibrosis. *Respir Res* 2018, **19**(1): 90.

116

117 2. Corneth OBJ, Verstappen GMP, Paulissen SMJ, de Bruijn MJW, Rip J, Lukkes M, *et al.*  
118 Enhanced Bruton's Tyrosine Kinase Activity in Peripheral Blood B Lymphocytes From Patients  
119 With Autoimmune Disease. *Arthritis Rheumatol* 2017, **69**(6): 1313-1324.

120

121 3. Maas A, Dingjan GM, Grosveld F, Hendriks RW. Early arrest in B cell development in  
122 transgenic mice that express the E41K Bruton's tyrosine kinase mutant under the control of  
123 the CD19 promoter region. *J Immunol* 1999, **162**(11): 6526-6533.

124

125 4. Middendorp S, Dingjan GM, Maas A, Dahlenborg K, Hendriks RW. Function of Bruton's  
126 tyrosine kinase during B cell development is partially independent of its catalytic activity. *J*  
127 *Immunol* 2003, **171**(11): 5988-5996.

128

129 5. Kim SN, Lee J, Yang HS, Cho JW, Kwon S, Kim YB, *et al.* Dose-response Effects of Bleomycin on  
130 Inflammation and Pulmonary Fibrosis in Mice. *Toxicol Res* 2010, **26**(3): 217-222.

131

132 6. McGovern TK, Robichaud A, Fereydoonzad L, Schuessler TF, Martin JG. Evaluation of  
133 respiratory system mechanics in mice using the forced oscillation technique. *J Vis Exp*  
134 2013(75): e50172.

135

- 136 7. GeurtsvanKessel CH, Willart MA, Bergen IM, van Rijt LS, Muskens F, Elewaut D, *et al.*  
137 Dendritic cells are crucial for maintenance of tertiary lymphoid structures in the lung of  
138 influenza virus-infected mice. *J Exp Med* 2009, **206**(11): 2339-2349.
- 139  
140 8. Ashcroft T, Simpson JM, Timbrell V. Simple method of estimating severity of pulmonary  
141 fibrosis on a numerical scale. *J Clin Pathol* 1988, **41**(4): 467-470.
- 142  
143 9. Borensztajn K, Bresser P, van der Loos C, Bot I, van den Blink B, den Bakker MA, *et al.*  
144 Protease-activated receptor-2 induces myofibroblast differentiation and tissue factor up-  
145 regulation during bleomycin-induced lung injury: potential role in pulmonary fibrosis. *Am J*  
146 *Pathol* 2010, **177**(6): 2753-2764.
- 147  
148  
149  
150  
151  
152  
153  
154  
155  
156  
157  
158  
159  
160  
161  
162  
163  
164

165 **online Supplementary Table 1** Overview of extra- and intracellular antibodies use for human and  
 166 mouse experiments.

| marker                                    | conjugate    | company     | Cat#          | intra/extracellular             | dilution |
|-------------------------------------------|--------------|-------------|---------------|---------------------------------|----------|
| <b>HUMAN</b>                              |              |             |               |                                 |          |
| <b>antibodies used for flow cytometry</b> |              |             |               |                                 |          |
| IgG                                       | FITC         | BD          | 555786        | extracellular                   | 1:20     |
| Btk                                       | PE           | BD          | 611117        | intracellular                   | 1:5      |
| IgM                                       | Bio          | BD          | 555781        | extracellular                   | 1:20     |
| CD19                                      | PerCP-Cy5.5  | BD          | 332780        | extracellular                   | 1:400    |
| CD38                                      | APC          | BD          | 560980        | extracellular                   | 1:10     |
| IgD                                       | APC-H7       | BD          | 561305        | extracellular                   | 1:10     |
| CD27                                      | BV421        | BD          | 562513        | extracellular                   | 1:80     |
| CD24                                      | BV711        | BD          | 563401        | extracellular                   | 1:40     |
| CD3                                       | AF700        | eBioscience | 56-0038-42    | extracellular                   | 1:40     |
| CXCR5                                     | PerCP5.5     | BD          | 562781        | extracellular                   | 1:20     |
| CD3                                       | APC ef780    | eBioscience | 47-0038-42    | extracellular                   | 1:100    |
| CD4                                       | AF700        | eBioscience | E08948-1631   | extracellular                   | 1:100    |
| CD45RA                                    | BV650        | BD          | 563963        | extracellular                   | 1:40     |
| PD1                                       | BV786        | BD          | 563789        | extracellular                   | 1:20     |
| FoxP3                                     | PE           | eBioscience | 12-4777-42    | intracellular                   | 1:20     |
| CXCR3                                     | BV711        | BD          | 563156        | extracellular                   | 1:20     |
| CCR4                                      | FITC         | BD          | FAB1567F      | extracellular                   | 1:20     |
| CCR6                                      | APC          | BD          | 560619        | extracellular                   | 1:5      |
| CXCR5                                     | PerCP5.5     | BD          | <b>562781</b> | extracellular                   | 1:20     |
| <b>HEp-2 antibodies</b>                   |              |             |               |                                 |          |
| Anti-Mouse F(ab') IgG                     | Cy3          | Jackson IR  | 115-166-003   |                                 |          |
| <b>MOUSE</b>                              |              |             |               |                                 |          |
| <b>antibodies used for flow cytometry</b> |              |             |               |                                 |          |
| GL7                                       | FITC         | BD          | 553666        | extracellular                   | 1:2000   |
| CD95                                      | PE-TxR       | BD          | 562499        | extracellular                   | 1:400    |
| IgM                                       | Pe-Cy7       | eBioscience | 25-5790-82    | extracellular/<br>intracellular | 1:500    |
| IgD                                       | APC          | eBioscience | 17-5993-82    | extracellular/<br>intracellular | 1:1280   |
| CD19                                      | Af700        | eBioscience | 56-0193-82    | extracellular                   | 1:50     |
| CD138                                     | BV605        | BD          | 563147        | extracellular                   | 1:400    |
| CD3                                       | PE-CF594     | BD          | 562286        | extracellular                   | 1:100    |
| CD4                                       | Af700        | eBioscience | 56-0041-82    | extracellular                   | 1:200    |
| MHC II                                    | FITC         | BD          | 553565        | extracellular                   | 1:200    |
| PD-1                                      | PE           | BD          | 551892        | extracellular                   | 1:100    |
| CD3                                       | PE-CF594     | BD          | 562286        | extracellular                   | 1:100    |
| CD40L (CD154)                             | PerCP-eFl710 | eBioscience | 46-1541-82    | extracellular                   | 1:100    |
| CXCR5                                     | biotin       | BD          | 551960        | extracellular                   | 1:50     |
| ICOS                                      | APC          | eBioscience | 17-9949-82    | extracellular                   | 1:1600   |

|                                   |            |             |             |               |       |
|-----------------------------------|------------|-------------|-------------|---------------|-------|
| CD4                               | AF700      | eBioscience | 56-0041-82  | extracellular | 1:400 |
| CD11c                             | APC-eFl750 | eBioscience | 47-0114-82  | extracellular | 1:200 |
| CD11b                             | eFl450     | eBioscience | 48-0112-82  | extracellular | 1:200 |
| PD-L1                             | BV711      | BD          | 563369      | extracellular | 1:100 |
| <b>HEp-2 antibodies</b>           |            |             |             |               |       |
| Anti-Human<br>F(ab') IgG          | Cy3        | Jackson IR  | 109-166-003 |               |       |
| <b>Immunohisto-chemistry Lung</b> |            |             |             |               |       |
| Anti- $\alpha$ SMA                | PE         | R&D         | IC1420P     |               |       |
| Anti-PE                           | AP         | Rockland    | 600-105-387 |               |       |
| Anti-B220                         | Unlabeled  | Bioceros    |             |               |       |
| Anti-Rat                          | AP         | Sigma       | A8438 – 1ML |               |       |
| Anti-hCD3                         | Unlabeled  | DAKO        | A0452       |               |       |
| Anti-Rabbit                       | Biotin     | Biogenex    | HK326-UR    |               |       |
| Anti-Goat                         | AP         | Sigma       | A4187 – 1ML |               |       |
| Anti-IgG                          | Biotin     | S. Biotech  | 1030-08     |               |       |
| Anti-IgM                          | Biotin     | S. Biotech  | 1020-08     |               |       |
| Streptavidin                      | AP         | Biogenex    | HK321-UK    |               |       |
| Streptavidin                      | PO         | Biogenex    | HK320-UK    |               |       |

167

168

169

170

171

172

173

174

175

176

177

178

179

180 **Online Supplementary Figure 1. Similar fibrosis indices in WT and CD19-hBTK mice upon bleomycin**  
 181 **exposure.**

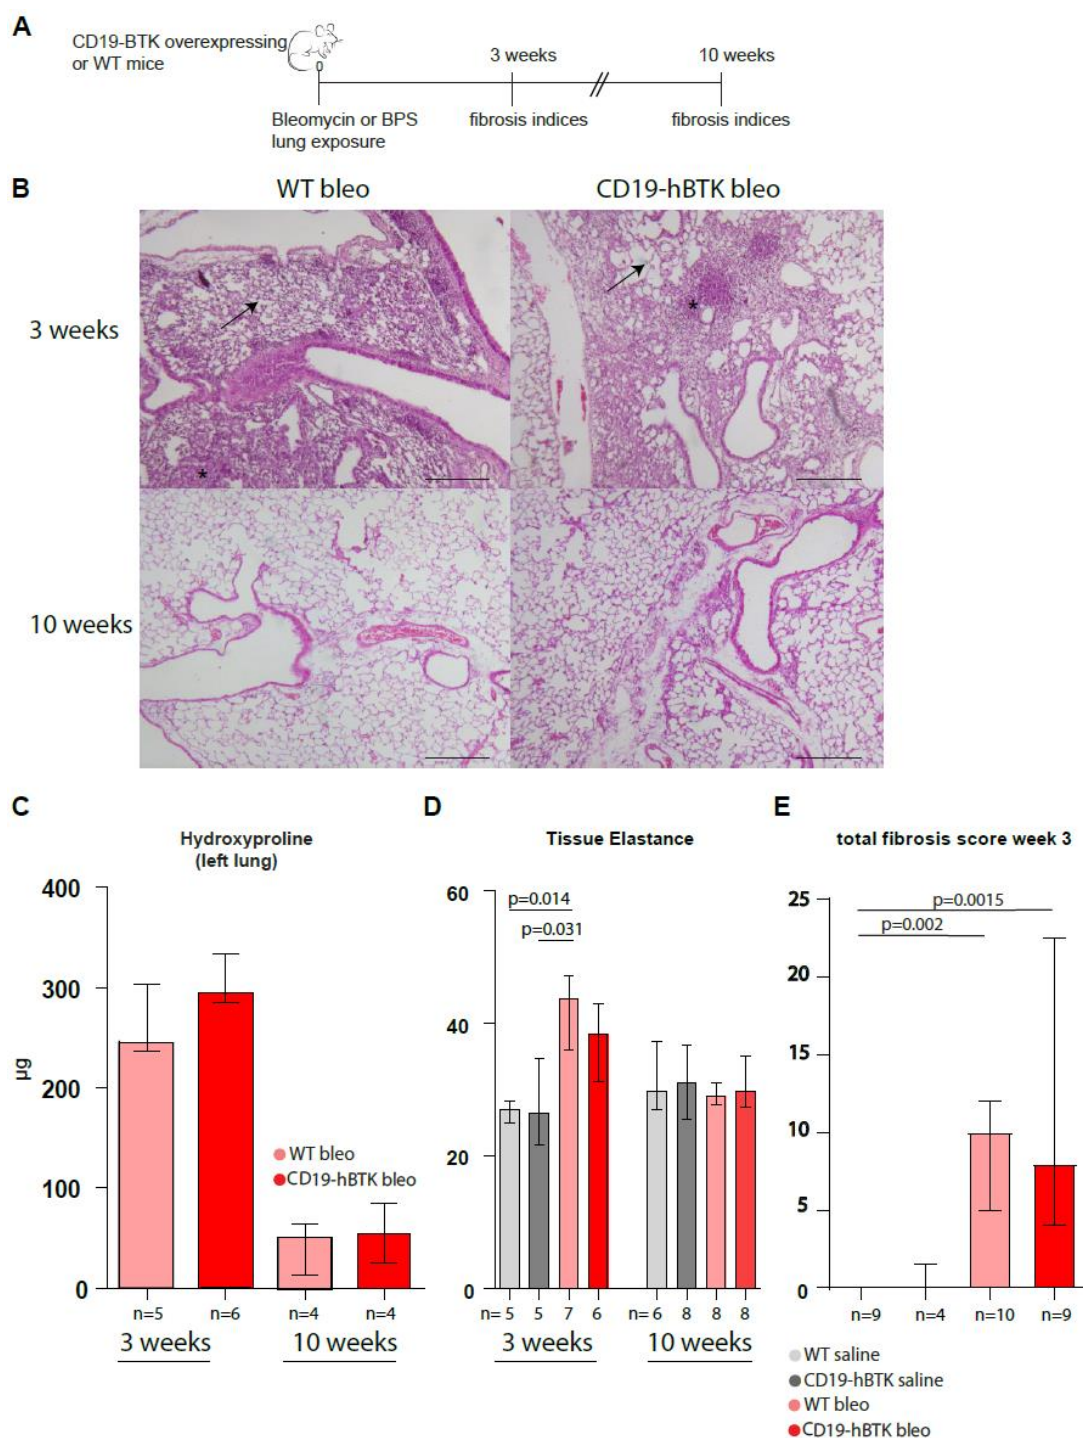

182

183 (A) Mice were sacrificed 3 and 10 weeks after saline or bleomycin exposure and analyzed for fibrosis  
 184 indices. (B) Representative hematoxylin/eosin (H&E) staining of cryo-sections of lung tissue of a WT or  
 185 CD19-hBTK mouse 3 and 10 weeks after bleomycin exposure. Inflammatory exudate and obvious



186 damage to lung architecture (asterisk) and diffuse fibrous thickening of alveolar septa (arrow).  
187 Resolution of fibrosis at 10 weeks. Magnification 40x. (C) Hydroxyproline content ( $\mu\text{g}$  per left lung) in  
188 WT or CD19-hBTK mice 3 and 10 weeks post bleomycin exposure (D) Tissue elastance assessed with a  
189 flexiVent FX system in WT or CD19-hBTK mice 21 days and 70 days post saline or bleomycin exposure.  
190 (E) Total fibrosis score. A pathologist (blinded for treatment) scored the Ashcroft scale (grade 1-8) and  
191 the percentage of lung involvement (grade 1-5; 1 = 0-10% to 5 = 75-100% of total lung involvement).  
192 The total fibrosis score is the product of Ashcroft scale and lung involvement. The results (C-E) are  
193 shown as median (IQR), p exact values were obtained following a Kruskal-Wallis test. Number of mice  
194 used for each experiment are depicted below the graph.

195

196

197

198

199

200

201

202

203

204

205

206

207

208

209

210

211

212 **Online Supplementary Figure 2.  $\alpha$ -SMA in WT or CD19-hBTK mice 10 weeks post bleomycin exposure.**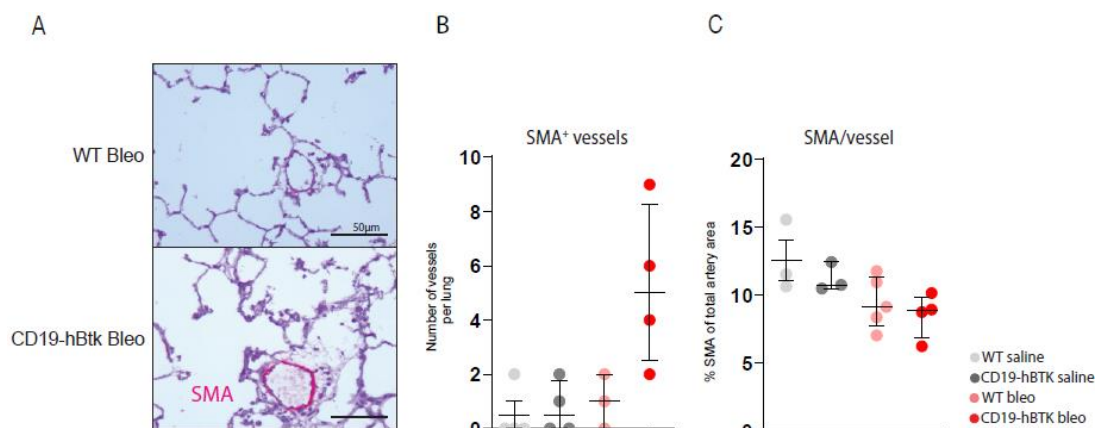

213

214

215 (A) Representative hematoxylin/eosin and  $\alpha$ -smooth muscle actin ( $\alpha$ -SMA) staining of cryo-sections of  
 216 the indicated lung tissue. (B) Number of SMA-positive vessels per lung. Vessels between 15 and 50  $\mu$ m  
 217 external diameter and located in normal lung tissue were assessed. (C) Percentage  $\alpha$ -SMA area to total  
 218 artery area of the assessed vessels. The results are shown as median (IQR), p exact values were  
 219 obtained following Kruskal-Wallis test. Dots represent individual mice.

220

221

222

223

224

225

226

227

228

229

230

231

232 **Online supplementary figure 3**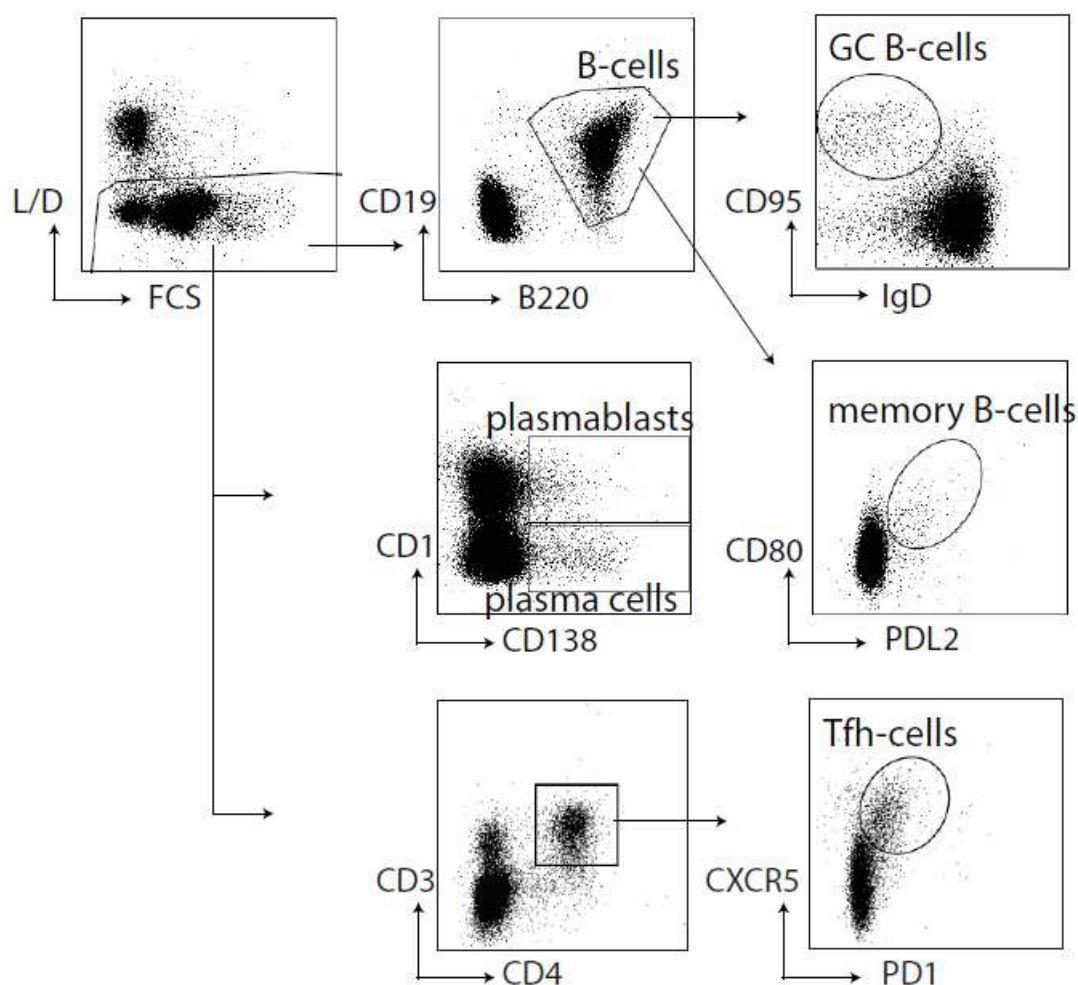

233

234 Representative gating strategy for identification of B-cell subsets and follicular T helper (Tfh)-cells in  
 235 mediastinal lymph nodes (MedLN) in mice, starting with live single cells. L/D, life-death marker; FCS,  
 236 forward scatter. From the total CD19<sup>+</sup>B220<sup>+</sup> B-cell population, memory B-cells  
 237 (CD19<sup>+</sup>B220<sup>+</sup>CD80<sup>+</sup>PDL2<sup>+</sup>), germinal center (GC) B-cells (CD19<sup>+</sup>B220<sup>+</sup>IgD<sup>+</sup>CD95<sup>+</sup>), plasmablasts  
 238 (CD19<sup>+</sup>CD138<sup>+</sup>) and plasma cells (CD19<sup>low</sup>CD138<sup>+</sup>) were identified. From the CD3<sup>+</sup>CD4<sup>+</sup> population, total  
 239 numbers of Tfh-cells (CD3<sup>+</sup>CD4<sup>+</sup>CXCR5<sup>+</sup>PD1<sup>+</sup>) were identified.

240

241

242

243

244

245

246

247 **Online Supplementary Figure 4: B-cell subsets and BTK expression in ILD-PH**

248

A

|                            | gender (male) | age (years)  | mPAP (mmHg) <sup>A</sup> | Immunomodulating therapies <sup>B</sup> | Anti fibrotics <sup>C</sup> |
|----------------------------|---------------|--------------|--------------------------|-----------------------------------------|-----------------------------|
| HC (N=16)                  | 10 (63%)      | 59 (54-64.5) | -                        | -                                       | -                           |
| ILD-PH (N=17) <sup>D</sup> | 5 (29%)       | 63 (57.5-76) | 35 (27-40)               | 5 (29%)                                 | 7 (41%)                     |

B

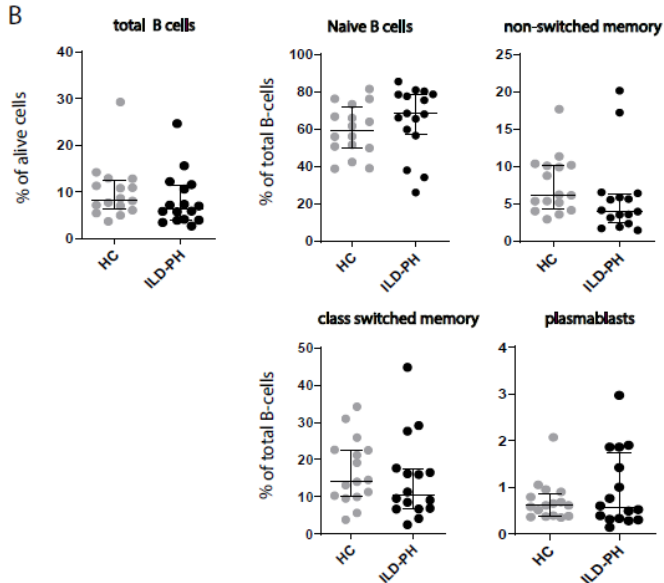

C

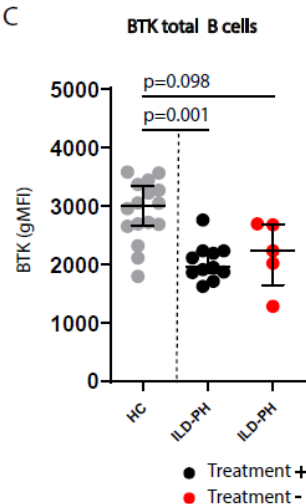

249

250 (A) Table showing the characteristics of patients with interstitial lung disease-related PH (ILD-PH) and  
 251 healthy subject (HC). mPAP; mean pulmonary artery pressure. <sup>A</sup> In 6 patients only echocardiographic  
 252 measurements available, showing estimated RVSP> 35mmHg and signs of RV dysfunction and no signs  
 253 of left heart disease or left sided heart failure. <sup>B</sup> Four patients used prednisone >10mg/day and one  
 254 patient was on azathioprine. <sup>C</sup> Nintedanib (n=3) or pirfenidone (n=4). <sup>D</sup> Ten patients with IPF, 3 patients  
 255 with non-specific interstitial pneumonia, 1 patient with respiratory bronchiolitis interstitial lung  
 256 disease, 1 patient with extrinsic allergic alveolitis, 1 patient with combined pulmonary fibrosis and  
 257 emphysema, and 1 patient with interstitial pneumonia with autoimmune features. Continuous  
 258 variables are presented as median and IQR in parentheses and categorical variable as count and  
 259 percentages in parentheses.

260 (B) Proportions of circulating total B-cells and B-cell subpopulations (naïve B-cells (CD19<sup>+</sup>IgD<sup>+</sup>CD27<sup>-</sup>),  
 261 non-switched memory B-cells (CD19<sup>+</sup>IgD<sup>+</sup>CD27<sup>+</sup>), and class switched memory B-cells (CD19<sup>+</sup>CD27<sup>+</sup>IgD<sup>-</sup>  
 262 IgM<sup>+</sup>), and plasmablasts (CD19<sup>+</sup>CD38<sup>hi</sup>CD27<sup>+</sup>)) in HC and patients with ILD-PH. (C) Quantification of BTK  
 263 protein expression levels, shown as gMFI values of intracellular flow cytometry analysis of total B cells

264 in HCs and ILD-PH patients receiving immunomodulatory or anti-fibrotic treatment (*black dots*) or no  
265 treatment (*red dots*). p exact values were obtained by a Mann-Whitney U test or Kruskal-Wallis test  
266 (>2 groups). Dots represent individual values in patients.

267

268

269

270

271

272

273

274

275

276

277

278

279

280

281

282

283

284

285

286

287

288

289

290

291

292

293

294

295

296

297

298

299 **Online Supplementary Figure 5: No correlation of cTfh cells and BTK protein in total B-cells**

300

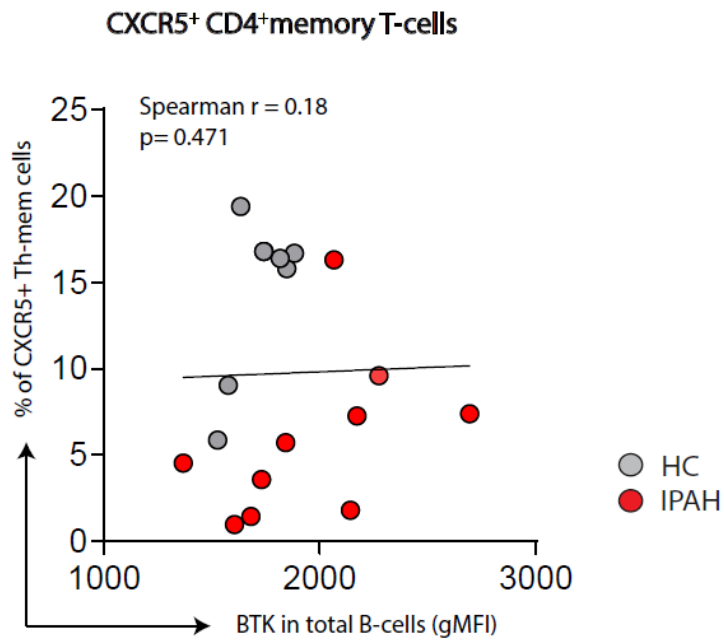

301

302 No correlation of circulating follicular T helper (cTfh) cells (CD4<sup>+</sup>CD45RA<sup>-</sup>FoxP3<sup>low</sup>CXCR5<sup>+</sup>) and BTK  
303 protein in total B cells in HC and patients with IPAH. Correlation coefficient was calculated using  
304 Spearman's rank method.

305

306

307
